# Supplementary material for: Flavonoid Biosynthesis Pathway May Indirectly Affect Outcrossing Rate of Cytoplasmic Male–Sterile Lines of Soybean
Source: MDPI journal article supplement (doi:10.3390/plants12193461), 2023-10-01
Supplement: s1 [file s1]

# Supplementary Material

## Supplementary Figures

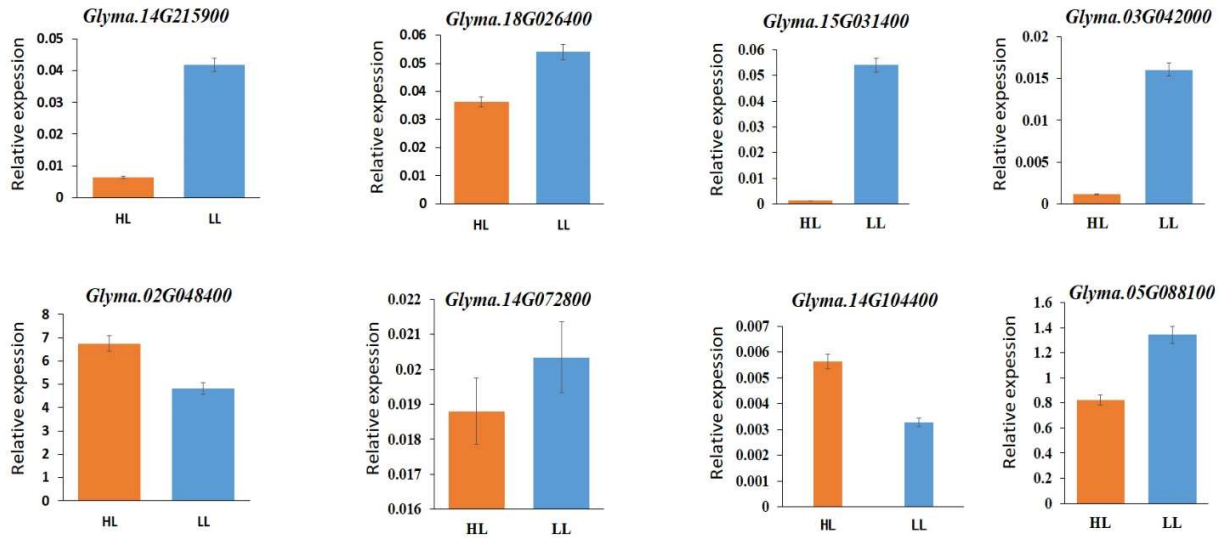

**Figure S1.** Result of relative expression between HL and LL.

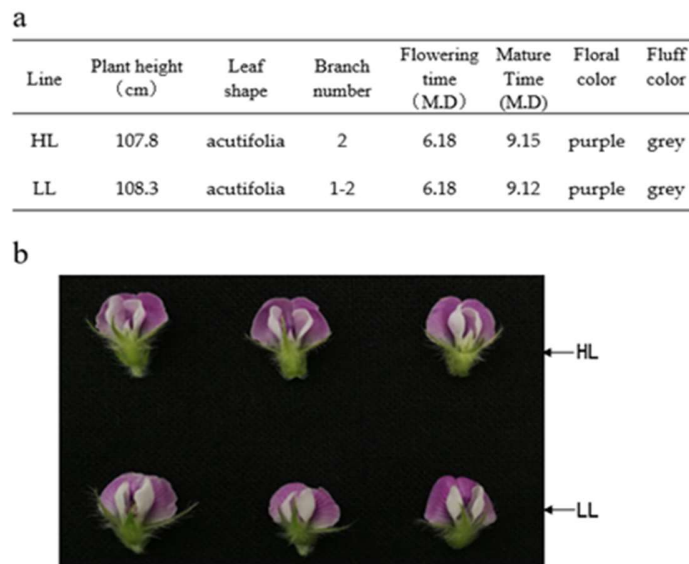

**Figure S2.** The agronomic traits of HL and LL. (a) major traits of HL and LL are showed; (b) the upper row shows three different flowers of HL; the lower row shows three different flowers of LL.

## Supplementary Tables

**Table S1.** Significantly enriched KEGG pathways among the DEGs between HL and LL

| KEGG ID  | Description                                 | GeneRatio | P-value     | adj.P-value | Count | Up | Down |
|----------|---------------------------------------------|-----------|-------------|-------------|-------|----|------|
| gmx01212 | Fatty acid metabolism                       | 28/1067   | 0.000109966 | 0.010385697 | 28    | 14 | 14   |
| gmx04145 | Phagosome                                   | 33/1067   | 0.000170257 | 0.010385697 | 33    | 4  | 29   |
| gmx00052 | Galactose metabolism                        | 26/1067   | 0.000339578 | 0.013809511 | 26    | 7  | 19   |
| gmx04626 | Plant-pathogen interaction                  | 58/1067   | 0.00050885  | 0.01438549  | 58    | 33 | 25   |
| gmx00360 | Phenylalanine metabolism                    | 20/1067   | 0.000589569 | 0.01438549  | 20    | 6  | 14   |
| gmx00906 | Carotenoid biosynthesis                     | 17/1067   | 0.000802181 | 0.014835704 | 17    | 7  | 10   |
| gmx04712 | Circadian rhythm - plant                    | 24/1067   | 0.000851229 | 0.014835704 | 24    | 12 | 12   |
| gmx00062 | Fatty acid elongation                       | 17/1067   | 0.002324342 | 0.034445629 | 17    | 2  | 15   |
| gmx00480 | Glutathione metabolism                      | 32/1067   | 0.002541071 | 0.034445629 | 32    | 22 | 10   |
| gmx00071 | Fatty acid degradation                      | 22/1067   | 0.002865574 | 0.034960006 | 22    | 13 | 9    |
| gmx00941 | Flavonoid biosynthesis                      | 19/1067   | 0.003237662 | 0.035606616 | 19    | 3  | 16   |
| gmx00061 | Fatty acid biosynthesis                     | 17/1067   | 0.004068194 | 0.035606616 | 17    | 8  | 9    |
| gmx00410 | beta-Alanine metabolism                     | 21/1067   | 0.004086005 | 0.035606616 | 21    | 13 | 8    |
| gmx01210 | 2-Oxocarboxylic acid metabolism             | 21/1067   | 0.004086005 | 0.035606616 | 21    | 17 | 4    |
| gmx00250 | Alanine, aspartate and glutamate metabolism | 19/1067   | 0.006141126 | 0.049947826 | 19    | 12 | 7    |

**Table S2.** Summary of the significant differentially abundant phenolic metabolites between HL and LL.

| Component Name    | Category                 | P-value | adj.P-value | log2(FC) | average(HL) | average(LL) |
|-------------------|--------------------------|---------|-------------|----------|-------------|-------------|
| Butein            | Flavanones               | 0.0111  | 0.0552      | 22.68    | 6.72        | 0.00        |
| Daidzein          | Isoflavones              | 0.0033  | 0.0268      | 1.20     | 258.88      | 112.58      |
| Ferulic acid      | Phenylpropanoids         | 0.0003  | 0.0046      | 1.20     | 3940.13     | 1718.61     |
| Glycitein         | Isoflavones              | 0.0008  | 0.0077      | 1.38     | 198.31      | 76.30       |
| Isoliquiritigenin | Flavanones               | 0.0116  | 0.0552      | 2.76     | 97.98       | 14.47       |
| Vanillic acid     | Benzoic acid derivatives | 0.0008  | 0.0077      | 1.35     | 4159.62     | 1635.43     |
| Eriodictyol       | Flavanones               | 0.0004  | 0.0050      | -1.57    | 37.89       | 112.80      |
| Genistein         | Isoflavones              | 0.0183  | 0.0758      | -2.41    | 186.24      | 987.77      |
| Naringenin        | Flavanones               | 0.0003  | 0.0046      | -1.02    | 537.87      | 1087.49     |
| Procyanidin B2    | Proanthocyanidins        | 0.0370  | 0.1327      | -1.22    | 587.96      | 1372.84     |
| Prunin            | Flavanones               | 0.0001  | 0.0046      | -1.98    | 2047.64     | 8067.45     |
| Trilobatin        | Dihydrochalcones         | 0.0002  | 0.0046      | -21.74   | 0.00        | 3.50        |

**Table S3.** Primers used for the qRT-PCR analysis

| Gene         | ID                     | Forward (5'-3')<br>Reverse (5'-3')                   | Product length<br>(bp) |
|--------------|------------------------|------------------------------------------------------|------------------------|
| <i>Act11</i> | <i>Glyma.18G290800</i> | GGTGGTTCTATCTTGGCATC<br>CTTTCGCTTCAATAACCCTA         | 138                    |
| <i>F3H</i>   | <i>Glyma.02G048400</i> | CTGCCTTCGTCGTCATCTTGGAG<br>AAGTGGCTATGGACAAACGGCTATG | 117                    |
| –            | <i>Glyma.15G031400</i> | TCTGCAATCAAGGATGGTGCAA<br>CCACAAAGTTCATTCCAAAGCGTA   | 109                    |
| –            | <i>Glyma.14G215900</i> | AGAGGGGGAGTTCTGTGGTAG<br>CAGCCACAAATGCATCACCA        | 83                     |
| –            | <i>Glyma.14G072800</i> | ATTGTCTCTGTGGAAGGCTGA<br>TTTGTCTCAGGGTCATTGCAC       | 124                    |
| –            | <i>Glyma.03G042000</i> | CGTGATTTGCCTTGATTTGTGG<br>GCCCCAATCCCATACGAGCAA      | 115                    |
| –            | <i>Glyma.05G088100</i> | GGAGTTCTTTGCCCTCCCTC<br>AGGAAGAAGGGTGTTCGGC          | 194                    |
| –            | <i>Glyma.18G026400</i> | TGAGAAACCCAAGACCCCAA<br>TGCTTGAGACAGAACCTTACAC       | 139                    |
| –            | <i>Glyma.14G104400</i> | GTGCAAGCCCTTCTGTTCAAG<br>TCCCTTAGCAAGGCAGAATCAG      | 124                    |

**Table S4.** Primers for cloning genes

| Gene       | ID                     | Forward (5'-3')                                         | CDS<br>length<br>(bp) | Annealing<br>Temperature<br>(°C) |
|------------|------------------------|---------------------------------------------------------|-----------------------|----------------------------------|
|            |                        | Reverse (5'-3')                                         |                       |                                  |
| <i>F3H</i> | <i>Glyma.02G048400</i> | CTTACCCATCCTTCAAACCTGAAGCA<br>TGCAGCCAATAATAAAGACAGTGCC | 1128                  | 50                               |
| <i>FLS</i> | <i>Glyma.05G088100</i> | ATGGAAGTGGAAAGAATACAAAC<br>TTATTGGGAAAGCTTATTGAATTT     | 996                   | 48                               |
| <i>UGT</i> | <i>Glyma.17G019500</i> | ATGGACTTGAAAGAACAGCCAC<br>TTAAGATTTACGGTCTCTGAATTGT     | 1410                  | 50                               |
| <i>SUS</i> | <i>Glyma.17G045800</i> | ATGGCCACTGATCGTTTGACC<br>TTACTCAACAGCAAGGGGCAC          | 2418                  | 50                               |
